# Supplementary material for: Scalable quantification of dynamic subcellular spatial organization in single cells across tissues
Source: Research Square preprint supplement (doi:10.21203/rs.3.rs-9916651/v1), 2026-07-02
Supplement: Supplementary file 1 [file 22e37327d33c6149181ba8b6.xlsx]

## Sheet: Flow Cytometry
antibody	company	clone	LOT	catalog	concentration	Validated species	Validated application	Note
anti-CD34-eFluor450	eBioscience	RAM34	4329944	48-0341-82	20 μg/mL	Fish, Goat, Hamster, Mouse	IHC, IF, Flow Cyt
anti-Sca1-PerCP-Cy5.5	eBioscience	D7	1931039	45-5981-82	5 μg/mL	Fish, Mouse	Flow Cyt
anti-CD48-APC	eBioscience	HM48-1	E07165-1633	17-0481-82	5 μg/mL	Fish, Human, Mouse	Flow Cyt
anti-cKit-PE-Cy7	eBioscience	2B8	E07592-1634	25-1171-82	5 μg/mL	Fish, Mouse, Pig	Flow Cyt, IF
streptavidin-APC-eFluor780	eBioscience	na	E10200-1633	47-4317-82	5 μg/mL	Species independent	Flow Cyt
anti-CD135-PE-CF594	BD	A2F10.1	8156535	562537	5 μg/mL	Mouse	Flow Cyt
anti-CD150-PE	Biolegend	TC15-12F12.2	B256074	115904	5 μg/mL	Mouse	Flow Cyt, IP
anti-CD48-PE	eBioscience	HM48-1	E01275-1634	12-0481-83	20 ng/mL	Fish, Human, Mouse	Flow Cyt
anti-CD48-APC	eBioscience	HM48-1	E07165-1633	17-0481-82	20 ng/mL	Fish, Human, Mouse	Flow Cyt
anti-CD71-PE	eBioscience	RI7 217.1.4	E01339-1632	12-0711-81	20 ng/mL	Fish, Human, Mouse	Flow Cyt
anti-CD71-APC	eBioscience	RI7 217.1.4	E11016-1635	17-0711-82	20 ng/mL	Fish, Human, Mouse	Flow Cyt
anti-Sca1-Alexa Fluor® 488	Biolegend	D7	B225713	108116	50 ng/mL	Mouse	Flow Cyt, IP, WB, IHC, IF
anti-CD105-Alexa Fluor® 488	BioLegend	MJ7/18	B228680	120405	50 ng/mL	Mouse	Flow Cyt, IP, WB, IHC, IF
anti-CD41-PE	BD	MWReg20	4337549	558040	20 ng/mL	Mouse	Flow Cyt
anti-CD41-APC	eBioscience	MWReg20	E10381-1631	17-0411-82	20 ng/mL	Human, Mouse	Flow Cyt
anti-NOTCH1-PE	eBioscience	22E5	4277731	12-5765-80	20 ng/mL	Mouse	Flow Cyt
anti-CD16/32-BV480	BD	2.4G2	746324	746324	40 ng/mL	Mouse	Flow Cyt
mouse anti-NUMB	Santa Cruz	48	D2711	sc-136554	4 μg/mL	Mouse	ICC-IF, IHC-P, IP, and WB
rabbit anti-PARD3b	Santa Cruz	F-12	J1014	sc-398887	4 μg/mL	Mouse	IF
anti- TOMM20-Alexa Fluor488	abcam	EPR15581	GR306988-4	ab205486	4 μg/mL	Human, predicted Mouse, Rat	ICC/IF
anti-TOMM20-Alexa Fluor555	abcam	EPR15581-44	GR3177327-1	ab221292	4 μg/mL	Mouse, Human	ICC/IF
anti-LC3β- Alexa Fluor488	abcam	EPR18709	GR3239743-1	ab225382	4 μg/mL	Human, predicted Mouse, Rat	ICC/IF
anti-cMYC-Alexa Fluor488	Santa Cruz	9E10	H2916	sc40	2 μg/mL	Mouse, Rat, Human, Cat, Monkey	ELISA, FC/FACS, IF, IHC, IHC-P, IP, and WB
mouse anti-mCherry	abcam	na	GR144686-1	ab167453	5 μg/mL	Species independent	WB, IHC, ICC/IF. Cited in 71 publication(s). Independently reviewed in 12 review(s)
rabbit anti-NUMB	abcam	na	na	ab14140	20 μg/mL	Mouse, Rat, Human, Zebrafish	IHC-P, ICC/IF, IHC-Fr, WB, IP, IHC	After evaluation, using HAP1 knockout cell lines, ab14140 was shown not to react specifically with the target protein and has therefore been discontinued.
goat anti-NUMB	abcam	na	GR257559-4	ab4147	20 μg/mL	Mouse, Rat, Chicken, Human	IHC-P, WB, IP, ICC/IF
goat anti-NUMB	Santa Cruz	P-20	I1604	sc-15590	4 μg/mL	Mouse	IF	discontinued and replaced by NUMB (48): sc-136554.
rabbit anti-NUMB	Santa Cruz	H-70	C0111	sc25668	4 μg/mL	Mouse	IF
Anti-alpha Adaptin antibody [AP6]	abcam	AP6	na	ab2730	2.5 μg/mL	Mouse, Rat, Hamster, Cow, Human, Drosophila melanogaster	ICC/IF, ICC, Inhibition Assay, Electron Microscopy, ELISA, Blocking, IP, WB, IHC-FoFr, Flow Cyt
rabbit anti-LAMP2	abcam	GL2A7	GR143671-2	ab37024	5 μg/mL	Mouse, Rabbit. Cited in 72 publication(s). Independently reviewed in 12 review(s).	WB, IP, IHC, ICC, Flow Cyt, ICC/IF
anti-α-Tubulin-Alexa Fluor488	Life Technologies	B-5-1-2	QA213137	322588	1 μg/mL	Human, Mouse, Rat	IF, ICC, WB, IHC
rabbit anti-α-Tubulin-Alexa Fluor647	Cell Signaling	11H10	8	5046	100 ng/mL	Mouse, Human, Rat, Monkey, Drosophila, Zebrafish, Pig	IF
chicken anti- GFP	Aves Lab	na	na	GFP-1010	10 μg/mL	Species independent	ELISA, ICC, IHC, WB
donkey anti-rabbit-Alexa Fluor488	Invitrogen	na	1674651	A21206	10 μg/mL	rabbit	IF, ICC, IHN, Flow Cyt
donkey anti-rabbit-Alexa Fluor555	Invitrogen	na	1736966	A31572	10 μg/mL	rabbit	IF, ICC, IHN, Flow Cyt
donkey anti-rabbit-Alexa Fluor647	Invitrogen	na	1903516	A31573	10 μg/mL	rabbit	IF, ICC, IHN, Flow Cyt
donkey anti-mouse-Alexa Fluor488	Invitrogen	na	1113537	A21202	10 μg/mL	rabbit	IF, ICC, IHN, Flow Cyt
donkey anti-mouse-Alexa Fluor555	Invitrogen	na	1736967	A31570	10 μg/mL	rabbit	IF, ICC, IHN, Flow Cyt
donkey anti-mouse-Alexa Fluor647	Invitrogen	na	1549801	A31571	10 μg/mL	rabbit	IF, ICC, IHN, Flow Cyt
donkey anti-goat-Alexa Fluor488	Invitrogen	na	1463163	A11055	10 μg/mL	rabbit	IF, ICC, IHN, Flow Cyt
donkey anti-goat-Alexa Fluor555	Invitrogen	na	1620248	A21432	10 μg/mL	rabbit	IF, ICC, IHN, Flow Cyt
donkey anti-goat-Alexa Fluor647	Invitrogen	na	1739289	A21447	10 μg/mL	rabbit	IF, ICC, IHN, Flow Cyt
anti-CD43-biotin	eBioscience	na	4298081	13-0431-85	10 μg/mL	Mouse	Flow Cyt
anti-CD3ε-biotin	eBioscience	145-2C11	4308809	13-0031-85	10 μg/mL	Human, Mouse	Flow Cyt, IHC, IF, IP, WB
anti-CD19-biotin	eBioscience	eBio1D3	1942197	13-0191-86	10 μg/mL	Mouse	Flow Cyt
anti-TER-119-biotin	eBioscience	TER-119	4300555	13-5921-85	10 μg/mL	Fish, Human, Mouse	Flow Cyt, IHC, IF
anti-B220-biotin	eBioscience	RA3-6B2	1930460	13-0452-86	10 μg/mL	Fish, Human, Mouse	Flow Cyt, IHC, IF
anti-Ly-6G-biotin	eBioscience	RB6-8C5	4340075	13-5931-85	10 μg/mL	Dog, Fish, Mouse	Flow Cyt, IHC, IF, IP
anti-CD11b-biotin	eBioscience	M1/70	1937241	13-0112-85	10 μg/mL	Fish, Human, Mouse	Flow Cyt, IHC, IF, WB
anti-F4/80-PE-eFluor610	eBioscience	BM8	1911636	61-4801-80	500 ng/mL	Fish, Hamster, Human, Mouse	Flow Cyt, IHC
anti-Ly6G-BrilliantViolet570	BioLegend	Gr-1	B261199	108431	500 ng/mL	Mouse	Flow Cyt
anti-CD71-FITC	eBioscience	RI7 217.1.4	4281163	11-0711-81	1.25 μg/mL	Fish, Mouse, Rat	Flow Cyt
anti-CD16/32-BrilliantViolet421	BioLegend	93	B238223	101331	500 ng/mL	Mouse	Flow Cyt
anti-Ter119-PE-Cy7	eBioscience	TER-119	E0746-1634	25-5921-82	250 ng/mL	Dog, Fish, Mouse	Flow Cyt
anti-Gr1- PE-Cy7	eBioscience	Ly6G	E07647-1635	25-5931-81	500 ng/mL	Fish, Human, Mouse	Flow Cyt, IHC
anti-CD11b-eFluor450	eBioscience	M1/70	E10253-1633	48-0112-82	500 ng/mL	Fish, Human, Mouse	Flow Cyt, IF, IHC
anti-CD16/32- PerCP-Cy5.5	Biolegend	93	B250025	101324	500 ng/mL	Fish, Fruit fly, Mouse	Flow Cyt
anti-Ter119-PE	eBioscience	TER-119	E01922-1631	12-5921-81	250 ng/mL	Fish, Human, Mouse	Flow Cyt
anti-c-KIT-APC-eFluor780	eBioscience	2B8	E10200-1633	47-1171-82	500 ng/mL	Fish, Human, Mouse, Pig	Flow Cyt

## Sheet: Immunofluorescence
antibody	company	clone	LOT	catalog	concentration	Validated species	Validated application	Note
anti-CD34-eFluor450	eBioscience	RAM34	4329944	48-0341-82	20 μg/mL	Fish, Goat, Hamster, Mouse	IHC, IF, Flow Cyt
anti-Sca1-PerCP-Cy5.5	eBioscience	D7	1931039	45-5981-82	5 μg/mL	Fish, Mouse	Flow Cyt
anti-CD48-APC	eBioscience	HM48-1	E07165-1633	17-0481-82	5 μg/mL	Fish, Human, Mouse	Flow Cyt
anti-cKit-PE-Cy7	eBioscience	2B8	E07592-1634	25-1171-82	5 μg/mL	Fish, Mouse, Pig	Flow Cyt, IF
streptavidin-APC-eFluor780	eBioscience	na	E10200-1633	47-4317-82	5 μg/mL	Species independent	Flow Cyt
anti-CD135-PE-CF594	BD	A2F10.1	8156535	562537	5 μg/mL	Mouse	Flow Cyt
anti-CD150-PE	Biolegend	TC15-12F12.2	B256074	115904	5 μg/mL	Mouse	Flow Cyt, IP
anti-CD48-PE	eBioscience	HM48-1	E01275-1634	12-0481-83	20 ng/mL	Fish, Human, Mouse	Flow Cyt
anti-CD48-APC	eBioscience	HM48-1	E07165-1633	17-0481-82	20 ng/mL	Fish, Human, Mouse	Flow Cyt
anti-CD71-PE	eBioscience	RI7 217.1.4	E01339-1632	12-0711-81	20 ng/mL	Fish, Human, Mouse	Flow Cyt
anti-CD71-APC	eBioscience	RI7 217.1.4	E11016-1635	17-0711-82	20 ng/mL	Fish, Human, Mouse	Flow Cyt
anti-Sca1-Alexa Fluor® 488	Biolegend	D7	B225713	108116	50 ng/mL	Mouse	Flow Cyt, IP, WB, IHC, IF
anti-CD105-Alexa Fluor® 488	BioLegend	MJ7/18	B228680	120405	50 ng/mL	Mouse	Flow Cyt, IP, WB, IHC, IF
anti-CD41-PE	BD	MWReg20	4337549	558040	20 ng/mL	Mouse	Flow Cyt
anti-CD41-APC	eBioscience	MWReg20	E10381-1631	17-0411-82	20 ng/mL	Human, Mouse	Flow Cyt
anti-NOTCH1-PE	eBioscience	22E5	4277731	12-5765-80	20 ng/mL	Mouse	Flow Cyt
anti-CD16/32-BV480	BD	2.4G2	746324	746324	40 ng/mL	Mouse	Flow Cyt
mouse anti-NUMB	Santa Cruz	48	D2711	sc-136554	4 μg/mL	Mouse	ICC-IF, IHC-P, IP, and WB
rabbit anti-PARD3b	Santa Cruz	F-12	J1014	sc-398887	4 μg/mL	Mouse	IF
anti- TOMM20-Alexa Fluor488	abcam	EPR15581	GR306988-4	ab205486	4 μg/mL	Human, predicted Mouse, Rat	ICC/IF
anti-TOMM20-Alexa Fluor555	abcam	EPR15581-44	GR3177327-1	ab221292	4 μg/mL	Mouse, Human	ICC/IF
anti-LC3β- Alexa Fluor488	abcam	EPR18709	GR3239743-1	ab225382	4 μg/mL	Human, predicted Mouse, Rat	ICC/IF
anti-cMYC-Alexa Fluor488	Santa Cruz	9E10	H2916	sc40	2 μg/mL	Mouse, Rat, Human, Cat, Monkey	ELISA, FC/FACS, IF, IHC, IHC-P, IP, and WB
mouse anti-mCherry	abcam	na	GR144686-1	ab167453	5 μg/mL	Species independent	WB, IHC, ICC/IF. Cited in 71 publication(s). Independently reviewed in 12 review(s)
rabbit anti-NUMB	abcam	na	na	ab14140	20 μg/mL	Mouse, Rat, Human, Zebrafish	IHC-P, ICC/IF, IHC-Fr, WB, IP, IHC	After evaluation, using HAP1 knockout cell lines, ab14140 was shown not to react specifically with the target protein and has therefore been discontinued.
goat anti-NUMB	abcam	na	GR257559-4	ab4147	20 μg/mL	Mouse, Rat, Chicken, Human	IHC-P, WB, IP, ICC/IF
goat anti-NUMB	Santa Cruz	P-20	I1604	sc-15590	4 μg/mL	Mouse	IF	discontinued and replaced by NUMB (48): sc-136554.
rabbit anti-NUMB	Santa Cruz	H-70	C0111	sc25668	4 μg/mL	Mouse	IF
Anti-alpha Adaptin antibody [AP6]	abcam	AP6	na	ab2730	2.5 μg/mL	Mouse, Rat, Hamster, Cow, Human, Drosophila melanogaster	ICC/IF, ICC, Inhibition Assay, Electron Microscopy, ELISA, Blocking, IP, WB, IHC-FoFr, Flow Cyt
rabbit anti-LAMP2	abcam	GL2A7	GR143671-2	ab37024	5 μg/mL	Mouse, Rabbit. Cited in 72 publication(s). Independently reviewed in 12 review(s).	WB, IP, IHC, ICC, Flow Cyt, ICC/IF
anti-α-Tubulin-Alexa Fluor488	Life Technologies	B-5-1-2	QA213137	322588	1 μg/mL	Human, Mouse, Rat	IF, ICC, WB, IHC
rabbit anti-α-Tubulin-Alexa Fluor647	Cell Signaling	11H10	8	5046	100 ng/mL	Mouse, Human, Rat, Monkey, Drosophila, Zebrafish, Pig	IF
chicken anti- GFP	Aves Lab	na	na	GFP-1010	10 μg/mL	Species independent	ELISA, ICC, IHC, WB
donkey anti-rabbit-Alexa Fluor488	Invitrogen	na	1674651	A21206	10 μg/mL	rabbit	IF, ICC, IHN, Flow Cyt
donkey anti-rabbit-Alexa Fluor555	Invitrogen	na	1736966	A31572	10 μg/mL	rabbit	IF, ICC, IHN, Flow Cyt
donkey anti-rabbit-Alexa Fluor647	Invitrogen	na	1903516	A31573	10 μg/mL	rabbit	IF, ICC, IHN, Flow Cyt
donkey anti-mouse-Alexa Fluor488	Invitrogen	na	1113537	A21202	10 μg/mL	rabbit	IF, ICC, IHN, Flow Cyt
donkey anti-mouse-Alexa Fluor555	Invitrogen	na	1736967	A31570	10 μg/mL	rabbit	IF, ICC, IHN, Flow Cyt
donkey anti-mouse-Alexa Fluor647	Invitrogen	na	1549801	A31571	10 μg/mL	rabbit	IF, ICC, IHN, Flow Cyt
donkey anti-goat-Alexa Fluor488	Invitrogen	na	1463163	A11055	10 μg/mL	rabbit	IF, ICC, IHN, Flow Cyt
donkey anti-goat-Alexa Fluor555	Invitrogen	na	1620248	A21432	10 μg/mL	rabbit	IF, ICC, IHN, Flow Cyt
donkey anti-goat-Alexa Fluor647	Invitrogen	na	1739289	A21447	10 μg/mL	rabbit	IF, ICC, IHN, Flow Cyt
anti-CD43-biotin	eBioscience	na	4298081	13-0431-85	10 μg/mL	Mouse	Flow Cyt
anti-CD3ε-biotin	eBioscience	145-2C11	4308809	13-0031-85	10 μg/mL	Human, Mouse	Flow Cyt, IHC, IF, IP, WB
anti-CD19-biotin	eBioscience	eBio1D3	1942197	13-0191-86	10 μg/mL	Mouse	Flow Cyt
anti-TER-119-biotin	eBioscience	TER-119	4300555	13-5921-85	10 μg/mL	Fish, Human, Mouse	Flow Cyt, IHC, IF
anti-B220-biotin	eBioscience	RA3-6B2	1930460	13-0452-86	10 μg/mL	Fish, Human, Mouse	Flow Cyt, IHC, IF
anti-Ly-6G-biotin	eBioscience	RB6-8C5	4340075	13-5931-85	10 μg/mL	Dog, Fish, Mouse	Flow Cyt, IHC, IF, IP
anti-CD11b-biotin	eBioscience	M1/70	1937241	13-0112-85	10 μg/mL	Fish, Human, Mouse	Flow Cyt, IHC, IF, WB
anti-F4/80-PE-eFluor610	eBioscience	BM8	1911636	61-4801-80	500 ng/mL	Fish, Hamster, Human, Mouse	Flow Cyt, IHC
anti-Ly6G-BrilliantViolet570	BioLegend	Gr-1	B261199	108431	500 ng/mL	Mouse	Flow Cyt
anti-CD71-FITC	eBioscience	RI7 217.1.4	4281163	11-0711-81	1.25 μg/mL	Fish, Mouse, Rat	Flow Cyt
anti-CD16/32-BrilliantViolet421	BioLegend	93	B238223	101331	500 ng/mL	Mouse	Flow Cyt
anti-Ter119-PE-Cy7	eBioscience	TER-119	E0746-1634	25-5921-82	250 ng/mL	Dog, Fish, Mouse	Flow Cyt
anti-Gr1- PE-Cy7	eBioscience	Ly6G	E07647-1635	25-5931-81	500 ng/mL	Fish, Human, Mouse	Flow Cyt, IHC
anti-CD11b-eFluor450	eBioscience	M1/70	E10253-1633	48-0112-82	500 ng/mL	Fish, Human, Mouse	Flow Cyt, IF, IHC
anti-CD16/32- PerCP-Cy5.5	Biolegend	93	B250025	101324	500 ng/mL	Fish, Fruit fly, Mouse	Flow Cyt
anti-Ter119-PE	eBioscience	TER-119	E01922-1631	12-5921-81	250 ng/mL	Fish, Human, Mouse	Flow Cyt
anti-c-KIT-APC-eFluor780	eBioscience	2B8	E10200-1633	47-1171-82	500 ng/mL	Fish, Human, Mouse, Pig	Flow Cyt

## Sheet: Time-lapse
antibody	company	clone	LOT	catalog	concentration	Validated species	Validated application	Note
anti-CD34-eFluor450	eBioscience	RAM34	4329944	48-0341-82	20 μg/mL	Fish, Goat, Hamster, Mouse	IHC, IF, Flow Cyt
anti-Sca1-PerCP-Cy5.5	eBioscience	D7	1931039	45-5981-82	5 μg/mL	Fish, Mouse	Flow Cyt
anti-CD48-APC	eBioscience	HM48-1	E07165-1633	17-0481-82	5 μg/mL	Fish, Human, Mouse	Flow Cyt
anti-cKit-PE-Cy7	eBioscience	2B8	E07592-1634	25-1171-82	5 μg/mL	Fish, Mouse, Pig	Flow Cyt, IF
streptavidin-APC-eFluor780	eBioscience	na	E10200-1633	47-4317-82	5 μg/mL	Species independent	Flow Cyt
anti-CD135-PE-CF594	BD	A2F10.1	8156535	562537	5 μg/mL	Mouse	Flow Cyt
anti-CD150-PE	Biolegend	TC15-12F12.2	B256074	115904	5 μg/mL	Mouse	Flow Cyt, IP
anti-CD48-PE	eBioscience	HM48-1	E01275-1634	12-0481-83	20 ng/mL	Fish, Human, Mouse	Flow Cyt
anti-CD48-APC	eBioscience	HM48-1	E07165-1633	17-0481-82	20 ng/mL	Fish, Human, Mouse	Flow Cyt
anti-CD71-PE	eBioscience	RI7 217.1.4	E01339-1632	12-0711-81	20 ng/mL	Fish, Human, Mouse	Flow Cyt
anti-CD71-APC	eBioscience	RI7 217.1.4	E11016-1635	17-0711-82	20 ng/mL	Fish, Human, Mouse	Flow Cyt
anti-Sca1-Alexa Fluor® 488	Biolegend	D7	B225713	108116	50 ng/mL	Mouse	Flow Cyt, IP, WB, IHC, IF
anti-CD105-Alexa Fluor® 488	BioLegend	MJ7/18	B228680	120405	50 ng/mL	Mouse	Flow Cyt, IP, WB, IHC, IF
anti-CD41-PE	BD	MWReg20	4337549	558040	20 ng/mL	Mouse	Flow Cyt
anti-CD41-APC	eBioscience	MWReg20	E10381-1631	17-0411-82	20 ng/mL	Human, Mouse	Flow Cyt
anti-NOTCH1-PE	eBioscience	22E5	4277731	12-5765-80	20 ng/mL	Mouse	Flow Cyt
anti-CD16/32-BV480	BD	2.4G2	746324	746324	40 ng/mL	Mouse	Flow Cyt
mouse anti-NUMB	Santa Cruz	48	D2711	sc-136554	4 μg/mL	Mouse	ICC-IF, IHC-P, IP, and WB
rabbit anti-PARD3b	Santa Cruz	F-12	J1014	sc-398887	4 μg/mL	Mouse	IF
anti- TOMM20-Alexa Fluor488	abcam	EPR15581	GR306988-4	ab205486	4 μg/mL	Human, predicted Mouse, Rat	ICC/IF
anti-TOMM20-Alexa Fluor555	abcam	EPR15581-44	GR3177327-1	ab221292	4 μg/mL	Mouse, Human	ICC/IF
anti-LC3β- Alexa Fluor488	abcam	EPR18709	GR3239743-1	ab225382	4 μg/mL	Human, predicted Mouse, Rat	ICC/IF
anti-cMYC-Alexa Fluor488	Santa Cruz	9E10	H2916	sc40	2 μg/mL	Mouse, Rat, Human, Cat, Monkey	ELISA, FC/FACS, IF, IHC, IHC-P, IP, and WB
mouse anti-mCherry	abcam	na	GR144686-1	ab167453	5 μg/mL	Species independent	WB, IHC, ICC/IF. Cited in 71 publication(s). Independently reviewed in 12 review(s)
rabbit anti-NUMB	abcam	na	na	ab14140	20 μg/mL	Mouse, Rat, Human, Zebrafish	IHC-P, ICC/IF, IHC-Fr, WB, IP, IHC	After evaluation, using HAP1 knockout cell lines, ab14140 was shown not to react specifically with the target protein and has therefore been discontinued.
goat anti-NUMB	abcam	na	GR257559-4	ab4147	20 μg/mL	Mouse, Rat, Chicken, Human	IHC-P, WB, IP, ICC/IF
goat anti-NUMB	Santa Cruz	P-20	I1604	sc-15590	4 μg/mL	Mouse	IF	discontinued and replaced by NUMB (48): sc-136554.
rabbit anti-NUMB	Santa Cruz	H-70	C0111	sc25668	4 μg/mL	Mouse	IF
Anti-alpha Adaptin antibody [AP6]	abcam	AP6	na	ab2730	2.5 μg/mL	Mouse, Rat, Hamster, Cow, Human, Drosophila melanogaster	ICC/IF, ICC, Inhibition Assay, Electron Microscopy, ELISA, Blocking, IP, WB, IHC-FoFr, Flow Cyt
rabbit anti-LAMP2	abcam	GL2A7	GR143671-2	ab37024	5 μg/mL	Mouse, Rabbit. Cited in 72 publication(s). Independently reviewed in 12 review(s).	WB, IP, IHC, ICC, Flow Cyt, ICC/IF
anti-α-Tubulin-Alexa Fluor488	Life Technologies	B-5-1-2	QA213137	322588	1 μg/mL	Human, Mouse, Rat	IF, ICC, WB, IHC
rabbit anti-α-Tubulin-Alexa Fluor647	Cell Signaling	11H10	8	5046	100 ng/mL	Mouse, Human, Rat, Monkey, Drosophila, Zebrafish, Pig	IF
chicken anti- GFP	Aves Lab	na	na	GFP-1010	10 μg/mL	Species independent	ELISA, ICC, IHC, WB
donkey anti-rabbit-Alexa Fluor488	Invitrogen	na	1674651	A21206	10 μg/mL	rabbit	IF, ICC, IHN, Flow Cyt
donkey anti-rabbit-Alexa Fluor555	Invitrogen	na	1736966	A31572	10 μg/mL	rabbit	IF, ICC, IHN, Flow Cyt
donkey anti-rabbit-Alexa Fluor647	Invitrogen	na	1903516	A31573	10 μg/mL	rabbit	IF, ICC, IHN, Flow Cyt
donkey anti-mouse-Alexa Fluor488	Invitrogen	na	1113537	A21202	10 μg/mL	rabbit	IF, ICC, IHN, Flow Cyt
donkey anti-mouse-Alexa Fluor555	Invitrogen	na	1736967	A31570	10 μg/mL	rabbit	IF, ICC, IHN, Flow Cyt
donkey anti-mouse-Alexa Fluor647	Invitrogen	na	1549801	A31571	10 μg/mL	rabbit	IF, ICC, IHN, Flow Cyt
donkey anti-goat-Alexa Fluor488	Invitrogen	na	1463163	A11055	10 μg/mL	rabbit	IF, ICC, IHN, Flow Cyt
donkey anti-goat-Alexa Fluor555	Invitrogen	na	1620248	A21432	10 μg/mL	rabbit	IF, ICC, IHN, Flow Cyt
donkey anti-goat-Alexa Fluor647	Invitrogen	na	1739289	A21447	10 μg/mL	rabbit	IF, ICC, IHN, Flow Cyt
anti-CD43-biotin	eBioscience	na	4298081	13-0431-85	10 μg/mL	Mouse	Flow Cyt
anti-CD3ε-biotin	eBioscience	145-2C11	4308809	13-0031-85	10 μg/mL	Human, Mouse	Flow Cyt, IHC, IF, IP, WB
anti-CD19-biotin	eBioscience	eBio1D3	1942197	13-0191-86	10 μg/mL	Mouse	Flow Cyt
anti-TER-119-biotin	eBioscience	TER-119	4300555	13-5921-85	10 μg/mL	Fish, Human, Mouse	Flow Cyt, IHC, IF
anti-B220-biotin	eBioscience	RA3-6B2	1930460	13-0452-86	10 μg/mL	Fish, Human, Mouse	Flow Cyt, IHC, IF
anti-Ly-6G-biotin	eBioscience	RB6-8C5	4340075	13-5931-85	10 μg/mL	Dog, Fish, Mouse	Flow Cyt, IHC, IF, IP
anti-CD11b-biotin	eBioscience	M1/70	1937241	13-0112-85	10 μg/mL	Fish, Human, Mouse	Flow Cyt, IHC, IF, WB
anti-F4/80-PE-eFluor610	eBioscience	BM8	1911636	61-4801-80	500 ng/mL	Fish, Hamster, Human, Mouse	Flow Cyt, IHC
anti-Ly6G-BrilliantViolet570	BioLegend	Gr-1	B261199	108431	500 ng/mL	Mouse	Flow Cyt
anti-CD71-FITC	eBioscience	RI7 217.1.4	4281163	11-0711-81	1.25 μg/mL	Fish, Mouse, Rat	Flow Cyt
anti-CD16/32-BrilliantViolet421	BioLegend	93	B238223	101331	500 ng/mL	Mouse	Flow Cyt
anti-Ter119-PE-Cy7	eBioscience	TER-119	E0746-1634	25-5921-82	250 ng/mL	Dog, Fish, Mouse	Flow Cyt
anti-Gr1- PE-Cy7	eBioscience	Ly6G	E07647-1635	25-5931-81	500 ng/mL	Fish, Human, Mouse	Flow Cyt, IHC
anti-CD11b-eFluor450	eBioscience	M1/70	E10253-1633	48-0112-82	500 ng/mL	Fish, Human, Mouse	Flow Cyt, IF, IHC
anti-CD16/32- PerCP-Cy5.5	Biolegend	93	B250025	101324	500 ng/mL	Fish, Fruit fly, Mouse	Flow Cyt
anti-Ter119-PE	eBioscience	TER-119	E01922-1631	12-5921-81	250 ng/mL	Fish, Human, Mouse	Flow Cyt
anti-c-KIT-APC-eFluor780	eBioscience	2B8	E10200-1633	47-1171-82	500 ng/mL	Fish, Human, Mouse, Pig	Flow Cyt
