# Supplementary material for: Scalable quantification of dynamic subcellular spatial organization in single cells across tissues
Source: Research Square preprint supplement (doi:10.21203/rs.3.rs-9916651/v1), 2026-07-02
Supplement: Supplementary file 2 [file 90f84fcd52913cd9ac8745b1.xlsx]

## Sheet: Nikon Ti-E2 Configuration
Microscope Body:	Ti-E2
Fluorescence Light Source:	SPCTR III 390/440/475/510/555/575/635/74 SPECTRA III, VBCTGYRnIR Light Source with 390/22,440/20, 475/28, 510/25, 555/28, 575/25, 637/12 and 748/12 bandpassfilters.
Transmitted Light Source:	Ti2-D-LHLED Transmitted Light LED Lamphouse, Built-In Fly Eye Lens forWide, Evem Illumination, 45mm Neutral Density ND32 Filter for Brightfield Observation
Camera:	KINETIX 10MP CMOS CAMERA 3200X3200 Photometrics Kinetix 10MP back-illuminated sCMOS Camera. 3200x3200,83FPS@16-bits, 6.5um pixel. 0C air cooling (@25C ambient), PCIe/USB3.2interface, F-mount connection. ~95% peak QE.
Stage:	TI2-S-SE-E MOTORIZED STAGE WITH ENCODER
Hardware Autofocus:	Ti2-ND-P Perfect Focus System 4, 340nm-800nm
Temperature Control:	OKO Temperature control unit - Bold Line. For use with Cage and Stage Top Incubators. Operated by the OKO-Touch.
Atmosphere Control:	Oko Digital Gas Miaxer - CO2-O2 Unit-BL [0-10;1-18]

## Sheet: FilterCubes
	Power	Cube 1	Cube 2	Cube 3	Filterset	Builtin Ex	Ex Filter	dichroic	Em Filter	Dyes	FProteins	Comment
Violett (365nn)	500mW	V1.1	V1.2	V1.3	A	395/25	395/25	420	435/26m	BV421, DAPI
Blue (440nm)	500mW	B1.1	B1.2	B1.3	A	438/29	436/20	455	470/24	BV480	CFP
Cyan (488nm)	500mW	C1.1	C1.2	C1.3	A	475/28	488/10	495	532/18	aF488, BB515	GFP
Cyan (488nm)	500mW	C2.1	C2.2	C2.3	B	475/28	470/30	540	695/40	PerCP
Cyan (488nm)	500mW	C3.1	na	na	C	475/28	488/10	580	605/15	NovaBlue610/30S
Cyan (488nm)	500mW	C4.1	na	na	D	475/28	488/10	685	711/25	RB705
Cyan (488nm)	500mW	C5.1	C5.2	C5.3	E	475/28	488/10	705	755/35	RB744
Cyan (488nm)	500mW	C6.1	na	na	F	475/28	488/10	738	786/22	RB780 (no signal when tested)
Teal (514nm)	500mW	T1.1	T1.2	T1.3	A	511/16	500/24	514	530/11	SPY505(?)	YFP, VENUS
Teal (514nm)	500mW	T2.1	T2.2	T2.3	B	511/16	514/20	535	555/30		mKO2, mKOk
Green (561nm)	500mW	G1.1	G1.2	G1.3	A	555/28	546/10	555	572/15	SparkYG570, aF555, PE, LysoBrRed	mKO2	241205DL: consider more specific em filter e.g. AVR 558/20 or 560/25 as this could enable imaging a555 and a594
Green (561nm)	500mW	G2.1	G2.2	G2.3	B	555/28	555/25	585	605/20	CoraLite 594, aF594	mCherry
Green (561nm)	500mW	G3.1	na	na	C	555/28	empty	580	605/15	NovaYellow610
Green (561nm)	500mW	G4.1	na	na	D	555/28	549/12	659	673/11
Yellow (594nm)	500mW	Y1.1	na	na	A	575/25	586/20	605	632/22	CoraLite 594, aF594	mCherry?
Yellow (594nm)	500mW	Y2.1	Y2.2	Y2.3	B	575/25	598/25	605	642/10	CoraLite 594, aF594	mCherry?
Yellow (594nm)	500mW	Y3.1	na	na	C	575/25	598/25	662	720/13	NovaFluorYellow 700 or 730
Yellow (594nm)	500mW	Y4.1	na	na	D	575/25	598/25	705	755/35	NovaFluorYellow 755
Red (640nm)	200mW	R1.1	R1.2	R1.3	A	637/12	620/30	645	660/13	CF647, aF647, APC, SPY650, LysoBrNIR		230417DL Chroma filtercube, replaced 670/30 em filter with 660/13 so it can be used with PerCP
Red (640nm)	200mW	R2.1	na	na	B	637/12	675/20	700	740/40			ex filter needs to be removed, does not work with current ex light source
Red (640nm)	200mW	R3.1	na	na	C	637/12	655/40	685	720/40		iRFP	ex filter needs to be removed, does not work with current ex light source
Red (640nm)	200mW	R4.1	R4.2	R4.3	D	637/12	642/10	662	685/10	SparkNIR685
Red (640nm)	200mW	R5.1	R5.2	R5.3	E	637/12	623/32	695	720/13	SparkRed718
Red (640nm)	200mW	R6.1	na	na	F	637/12	642/10	695	720/13			test: IF aF680 + a594?
NIR (730nm)	200mW	N1.1	na	na	A	748/12	740/40	770	790lp	a750		once tested with self-label IR800CW, worked, second test did not, try again

## Sheet: Objectives
Magnification	Name	Catalog	NA	Type	WD (mm)	Imm	FOV	DIC
10	CFI60 PLAN APOCHROMAT LAMBDA D 10X	MRD70170	0.45	Plan Apo lambda	4.0 mm	Air	25mm	DIC
20	CFI60 PLAN APOCHROMAT LAMBDA D 20X	MRD70270	0.8	Plan Apo lambda	0.8 mm	Air	25mm	DIC
40	CFI60 PLAN APOCHROMAT LAMBDA D 40X	MRD70470	0.95	Plan Apo lambda	0.17 - 0.25mm	Air	25mm	DIC
60	CFI60 PLAN APOCHROMAT LAMBDA D 60X Oil	MRD71670	1.42	Plan Apo lambda	0.15 mm	Oil	25mm	DIC
100	CFI60 PLAN APOCHROMAT LAMBDA D 100X Oil	MRD71970	1.45	Plan Apo lambda	0.13 mm	Oil	25mm	DIC
