# Supplementary material for: Scalable quantification of dynamic subcellular spatial organization in single cells across tissues
Source: Research Square preprint supplement (doi:10.21203/rs.3.rs-9916651/v1), 2026-07-02
Supplement: Supplementary file 3 [file f4137537ffc2f9b5393e5d0f.xlsx]

## Sheet: BD FACS Aria Fusion
Laser Order	Laser	Wavelength	Laser Power	Notes
1	OBIS	488	100mW	S/N: R65828200128
2	OBIS	640	100mW	SOFTWARE VERSION: BD FACSDiva 8.0.3
3	OBIS	405	100mW	CONFIGURATION: 2-Blue 3-Red 6-Violet 4-YG 3-UV
4	OBIS	561	100mW
5	OBIS	355	15mw
LASER DETECTOR
Laser	Detector	Longpass Mirror	Bandpass Filter	FLUOROCHROME AND ALTERNATIVES	FL NO.
488-BLUE	FSC		488/10	FSC
488-BLUE	C		488/10	SSC
488-BLUE	B	505LP	530/30	FITC, BB515, GFP, AF488, Venus, CFSE, Thiazole Orange, YFP	1
488-BLUE	A	690LP	710/50	PerCP Cy 5.5, PerCP-eFluor 710, BB700, 7AAD	2
561-YG	D		586/15	PE, Orange, Alexa-594	3
561-YG	C	600LP	610/20	PE-Texas Red, ECD, PE CF594, mCherry, PI/Dead Cell	4
561-YG	B	635LP	670/30	PE Cy5, mPlum	5
561-YG	A	750LP	780/60	PE Cy7	6
640-RED	C		670/30	APC, AF647, Live/Dead-Far Red	7
640-RED	B	690LP	710/50	Alexa700, APC-R700	8
640-RED	A	750LP	780/60	APC Cy7, APC-H7, APC-e780, APC-Alexa750, APC-vio770	9
405-VIO	F		450/50	DAPI, BV421, Pacific Blue, V450, Cascade Blue, Live/Dead-Vio, Hoechst	10
405-VIO	E	505LP	525/50	BV510, V500, Pacific Orange, Live/Dead -Aqua, mAmetrine	11
405-VIO	D	600LP	610/20	BV605, eFluor 605, Qdot 605, Evolve 605, eFluor 605	12
405-VIO	C	635LP	670/30	BV650	13
405-VIO	B	690LP	710/50	BV711	14
405-VIO	A	750LP	780/60	BV786	15
355-UV	C		379/29	BUV396	16
355-UV	B	410LP	515/30	BUV496	17
355-UV	A	690LP	740/35	BUV737	18

## Sheet: BD FACSymphony S6
Laser Order	Laser	Wavelength	Laser Power	BD Symphony S6
1	Blue	488	100mW	S/N: R66293700088
2	Red	637	140mW	SOFTWARE VERSION: BD FACSDiva 9.1
3	Violet	405	100mW	Configuration: 4B-3R-6V-6UV-4YG
4	UV	355	60mW
5	Yellow-Green	561	100mW
PARAMETER ASSIGNMENT
LASER	DETECTOR	Longpass Mirror	Bandpass Filter	FLUOROCHROME AND ALTERNATIVES	FL NO.
488-BLUE	FSC		488/10	FSE
	E		488/10	SSC	1
	D	505LP	515/20	AF488, BB515, FITC, GFP, YFP,LIVE/DEAD Green, Venus, ZsGreen, Mitotracker-FM, Calcein, Thiazole Orange, CFSE, Sytox-Green, Rhodamine-123	2
	C	600LP	610/20	BB630	3
	B	690LP	710/50	PerCp-Cy5.5, BB700, PI, PE-Cy5.5, PE-A700, 7AAD	4
	A	770LP	780/60	BB790	5
638-RED	C	650LP	670/30	APC, AF647, Live/Dead Far Red	6
	B	690LP	710/50	Alexa700, APC-R700	7
	A	750LP	780/60	APC Cy7, APC eFluor780, LIVE/DEAD Near-IR	8
405-VIO	F	410LP	431/28	DAPI, Pacific Blue, BV421, BV450, V450, Alexa Fluor 406, LIVE/DEAD-Violet, Cascade Blue, Hoechst, BFP	9
	E	505LP	525/50	BV510, mAmetrine, V500, Pacific Orange, AmCyan, Cascade Yellow	10
	D	600LP	610/20	BV605, eFluor-605, Qdot-605, Evolve-605, eFluor-605	11
	C	635LP	670/30	BV650	12
	B	690LP	710/50	BV711	13
	A	750LP	780/60	BV786	14
561-YG	D	570LP	586/15	PE, tdTomato, kOrange	21
	C	600LP	610/20	PE CF594, mCherry, Texas Red, LIVE/DEAD-Orange, LIVE/DEAD-Red, DsRed, ECD, PE-Texas Red, Alexa-594, PI/DNA Content, PI/Dead Cell	22
	B	650LP	670/30	PE Cy5, mPlum, 7-AAD	23
	A	750LP	780/60	PE Cy7	24
355-UV	F		379/28	BUV396	15
	E	450	515/30	BUV496, Live/Dead Aqua	16
	D	550LP	586/15	BUV563	17
	C	635LP	670/30	BUV661	18
	B	690LP	740/35	BUV737	19
	A	770LP	820/60	BUV805	20
